# Supplementary material
Source: PubMed Central journal article supplement (PMC3760141)

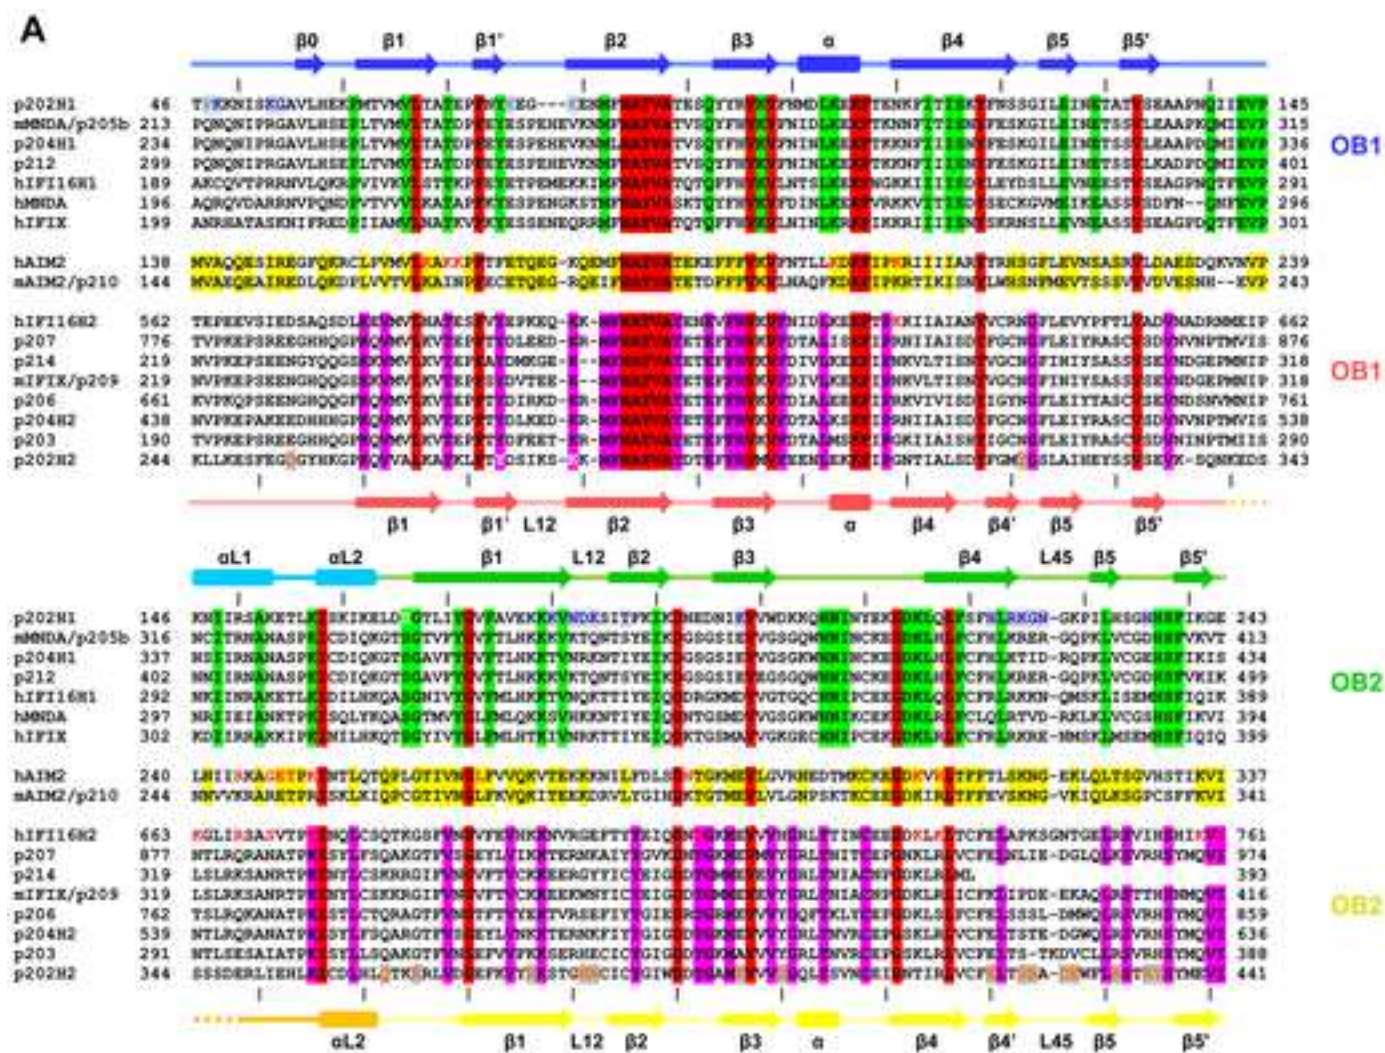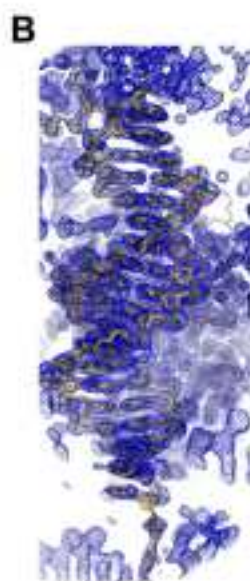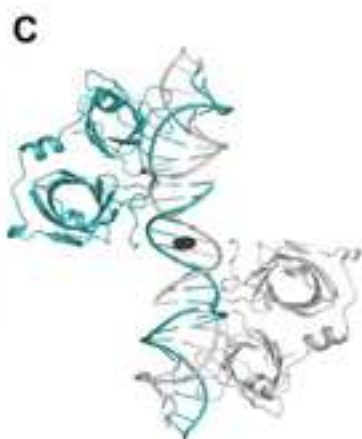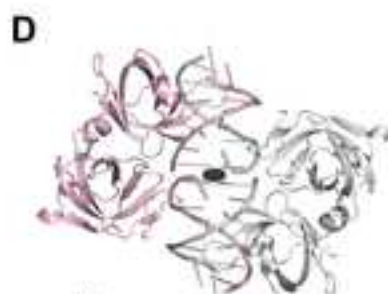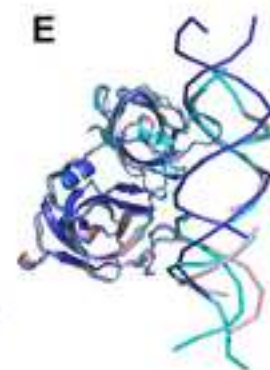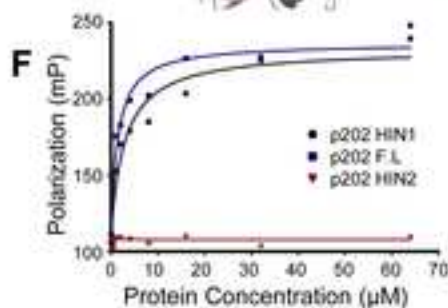

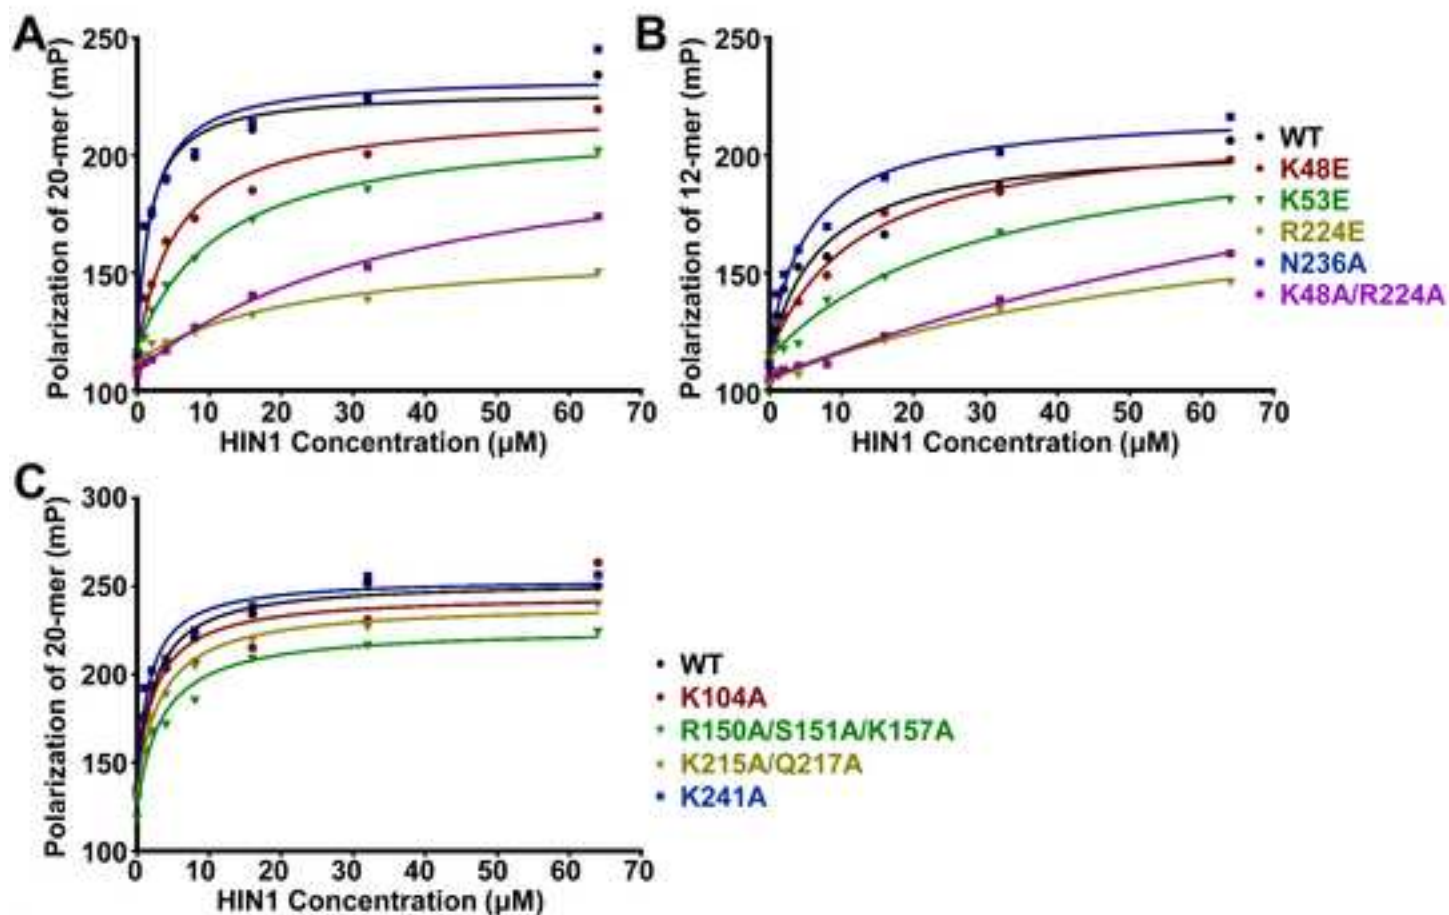

**D**

|                   | $K_D$ for 20-mer dsDNA ( $\mu\text{M}$ ) | $K_D$ for 12-mer dsDNA ( $\mu\text{M}$ ) |
|-------------------|------------------------------------------|------------------------------------------|
| WT                | $1.7 \pm 0.5$                            | $7.1 \pm 3.8$                            |
| K48E              | $5.5 \pm 1.9$                            | $12.5 \pm 2.8$                           |
| K53E              | $11.7 \pm 1.9$                           | $29.8 \pm 9.1$                           |
| R224E             | $21.6 \pm 9.8$                           | $66.8 \pm 31.2$                          |
| N236A             | $2.1 \pm 0.8$                            | $5.6 \pm 1.8$                            |
| K48A/R224A        | $38.9 \pm 6.6$                           | $130.4 \pm 50.1$                         |
| K104A             | $3.0 \pm 1.4$                            | --                                       |
| R150A/S151A/K157A | $3.0 \pm 0.9$                            | --                                       |
| K215A/Q217A       | $2.7 \pm 1.2$                            | --                                       |
| K241A             | $1.8 \pm 0.6$                            | --                                       |

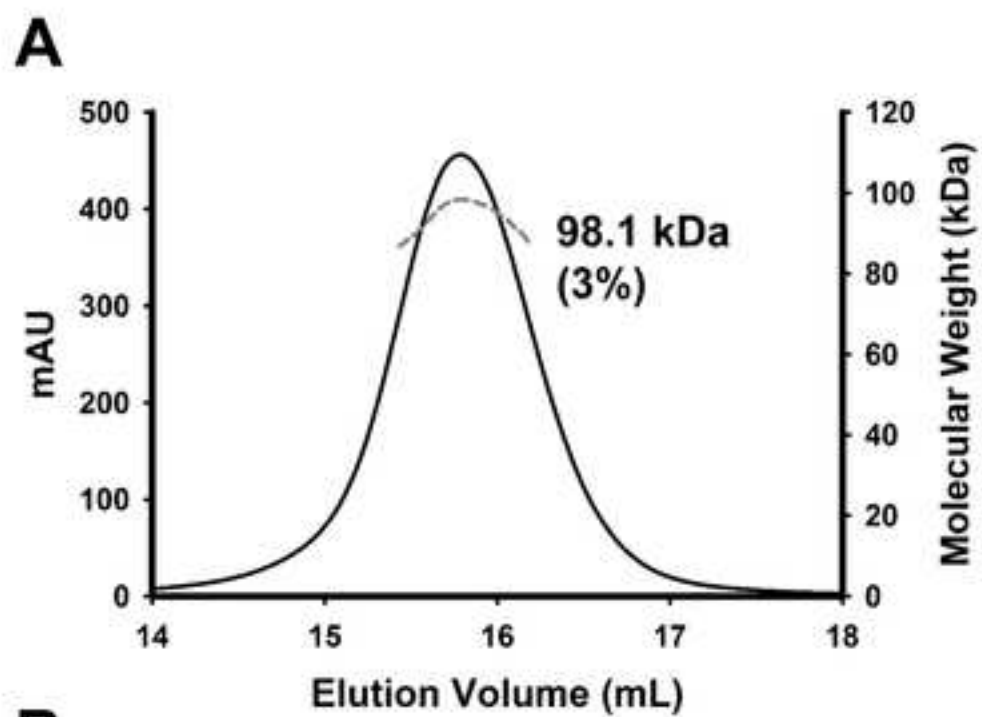

**B**

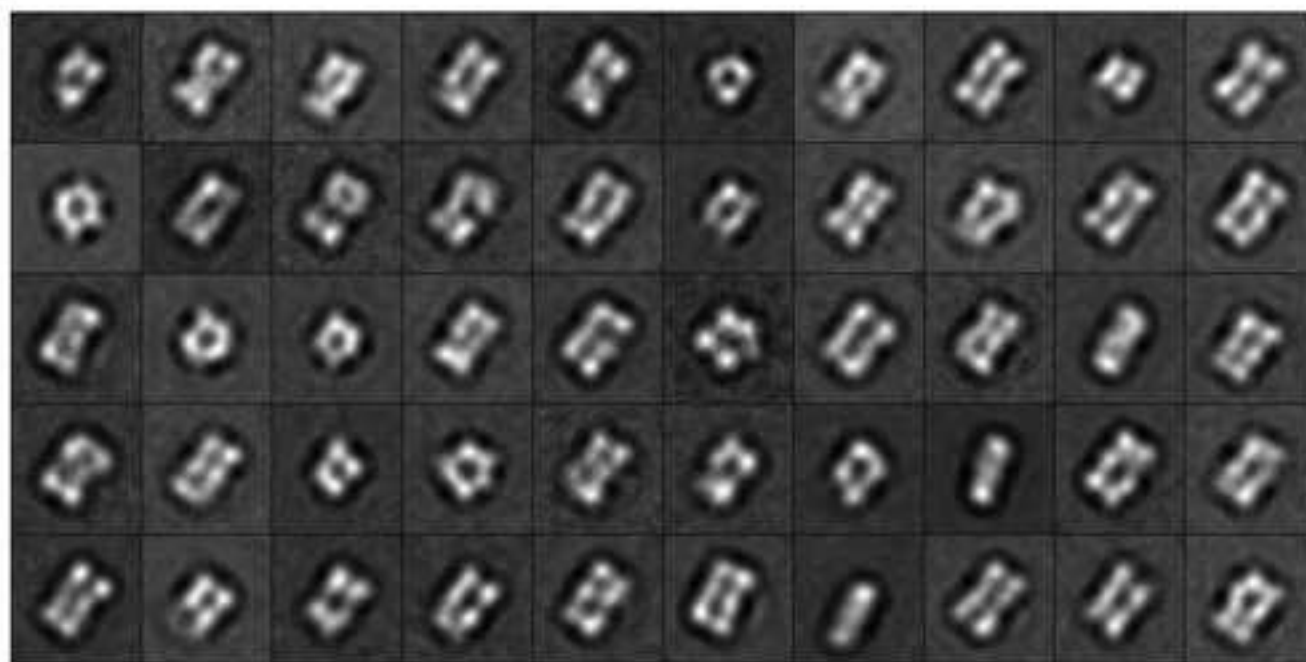

— 10 nm

**A**

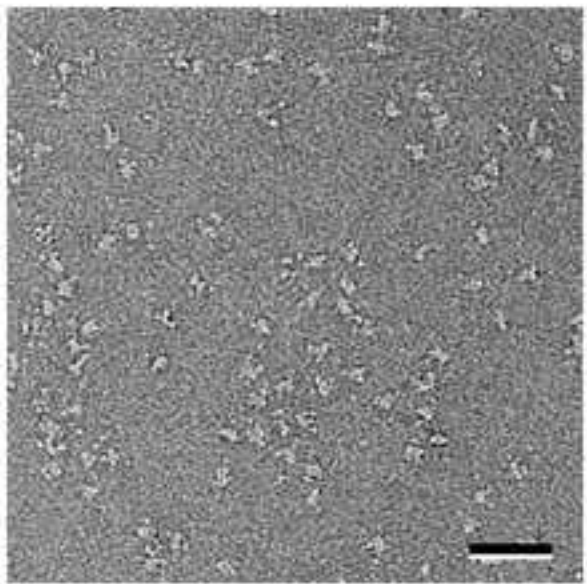

**B**

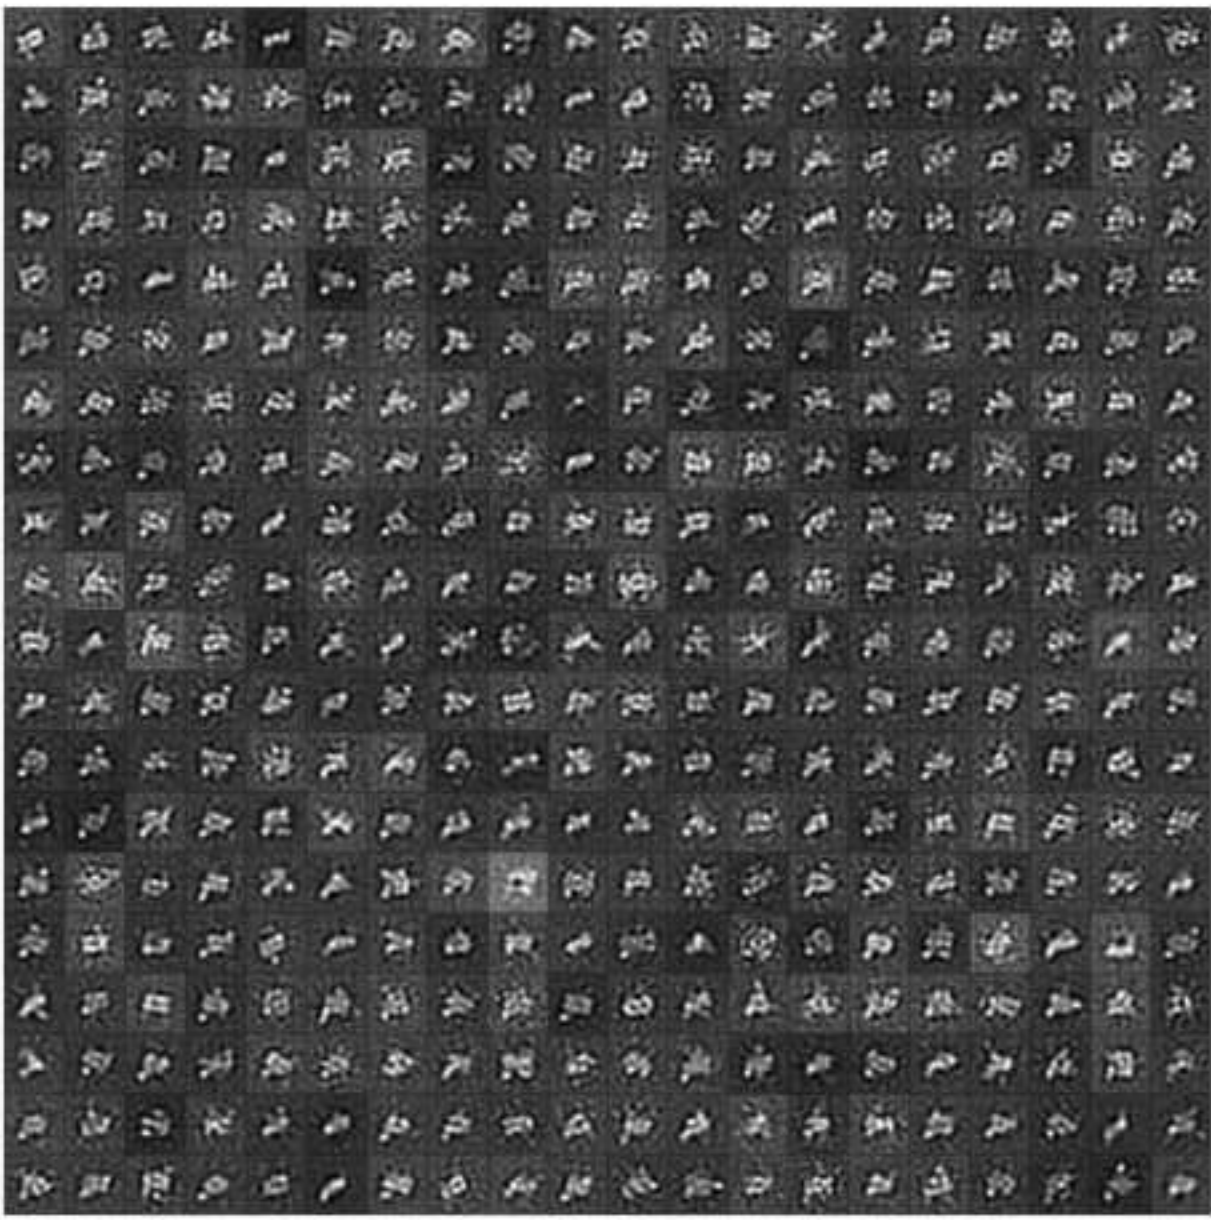

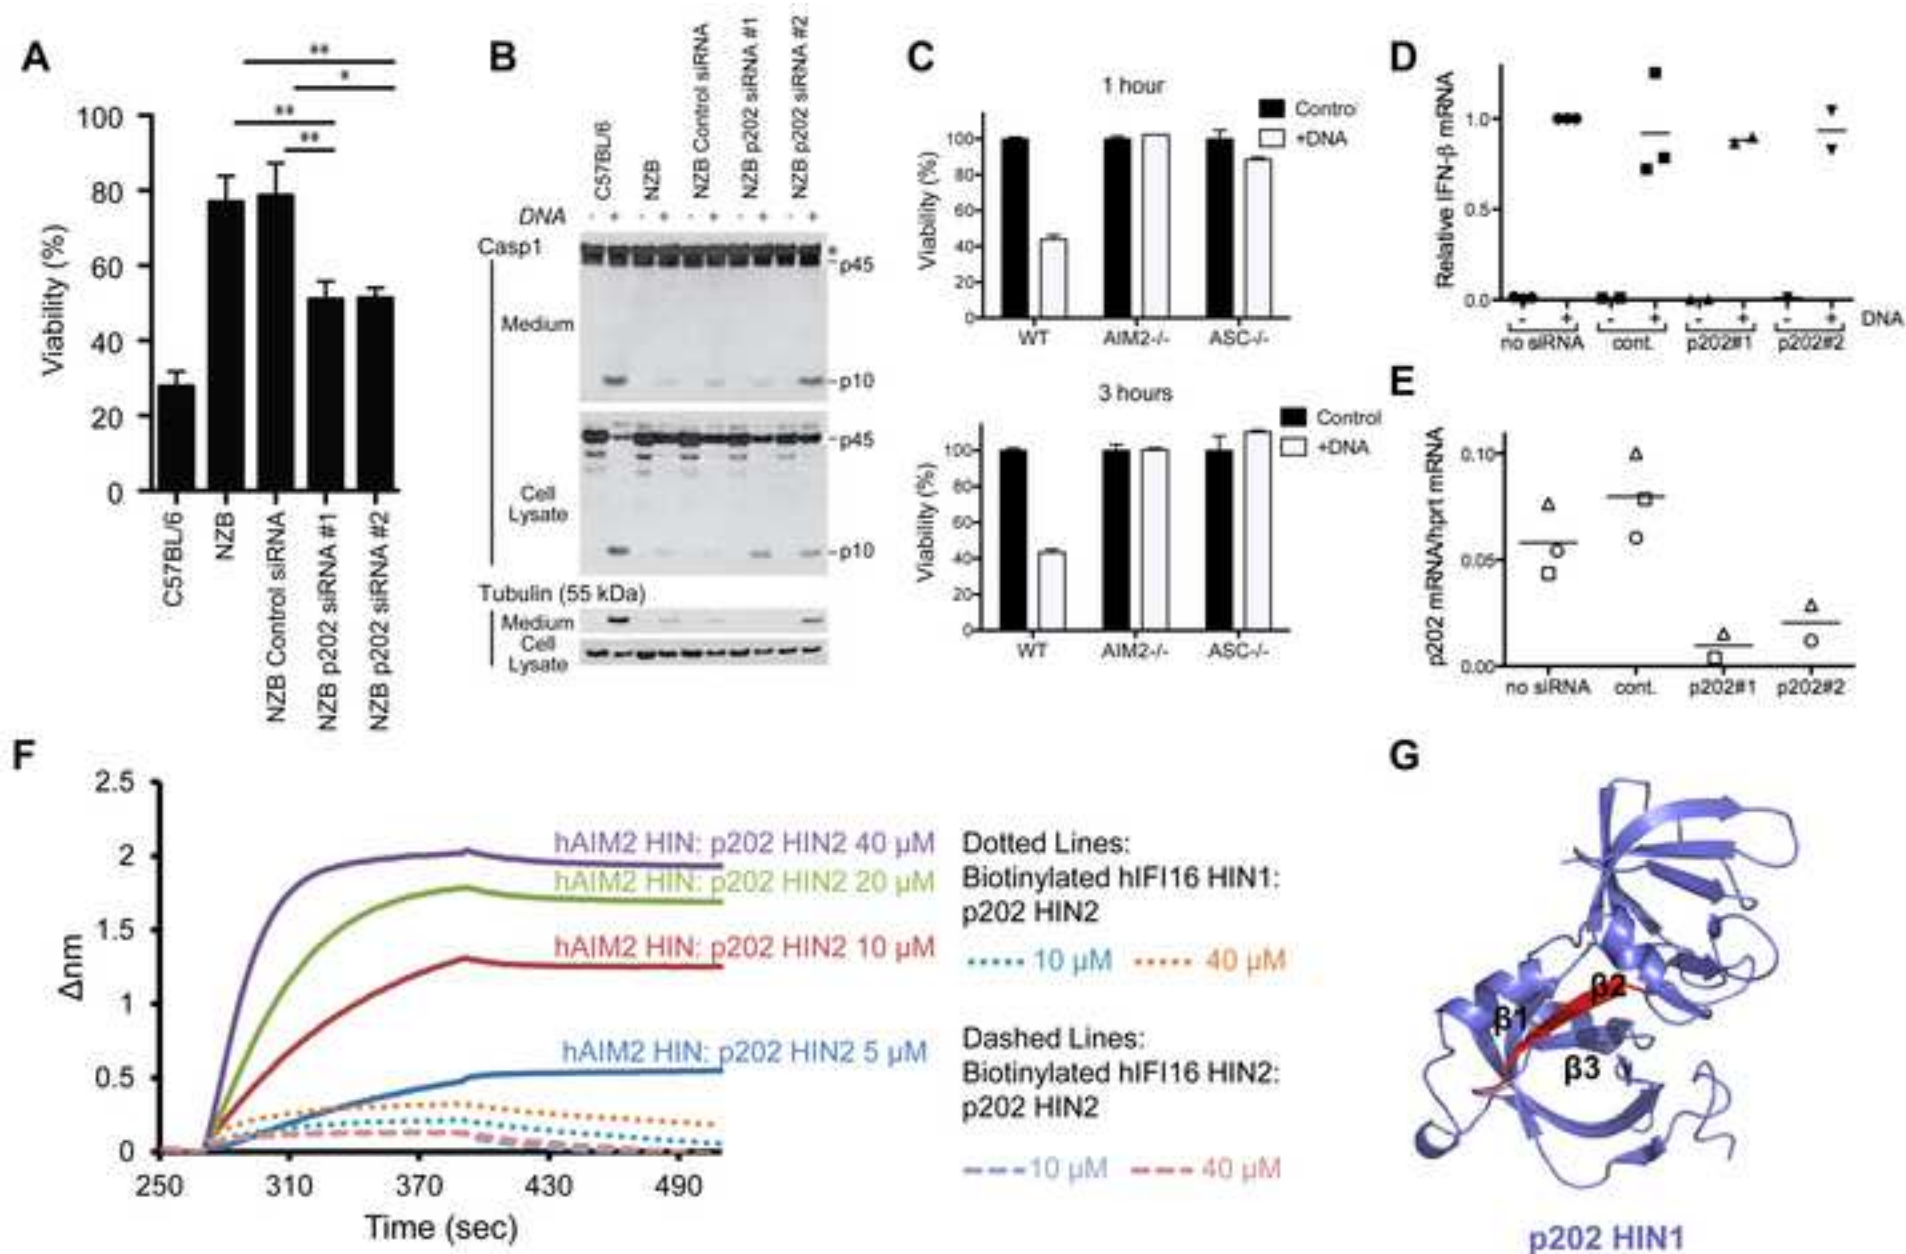

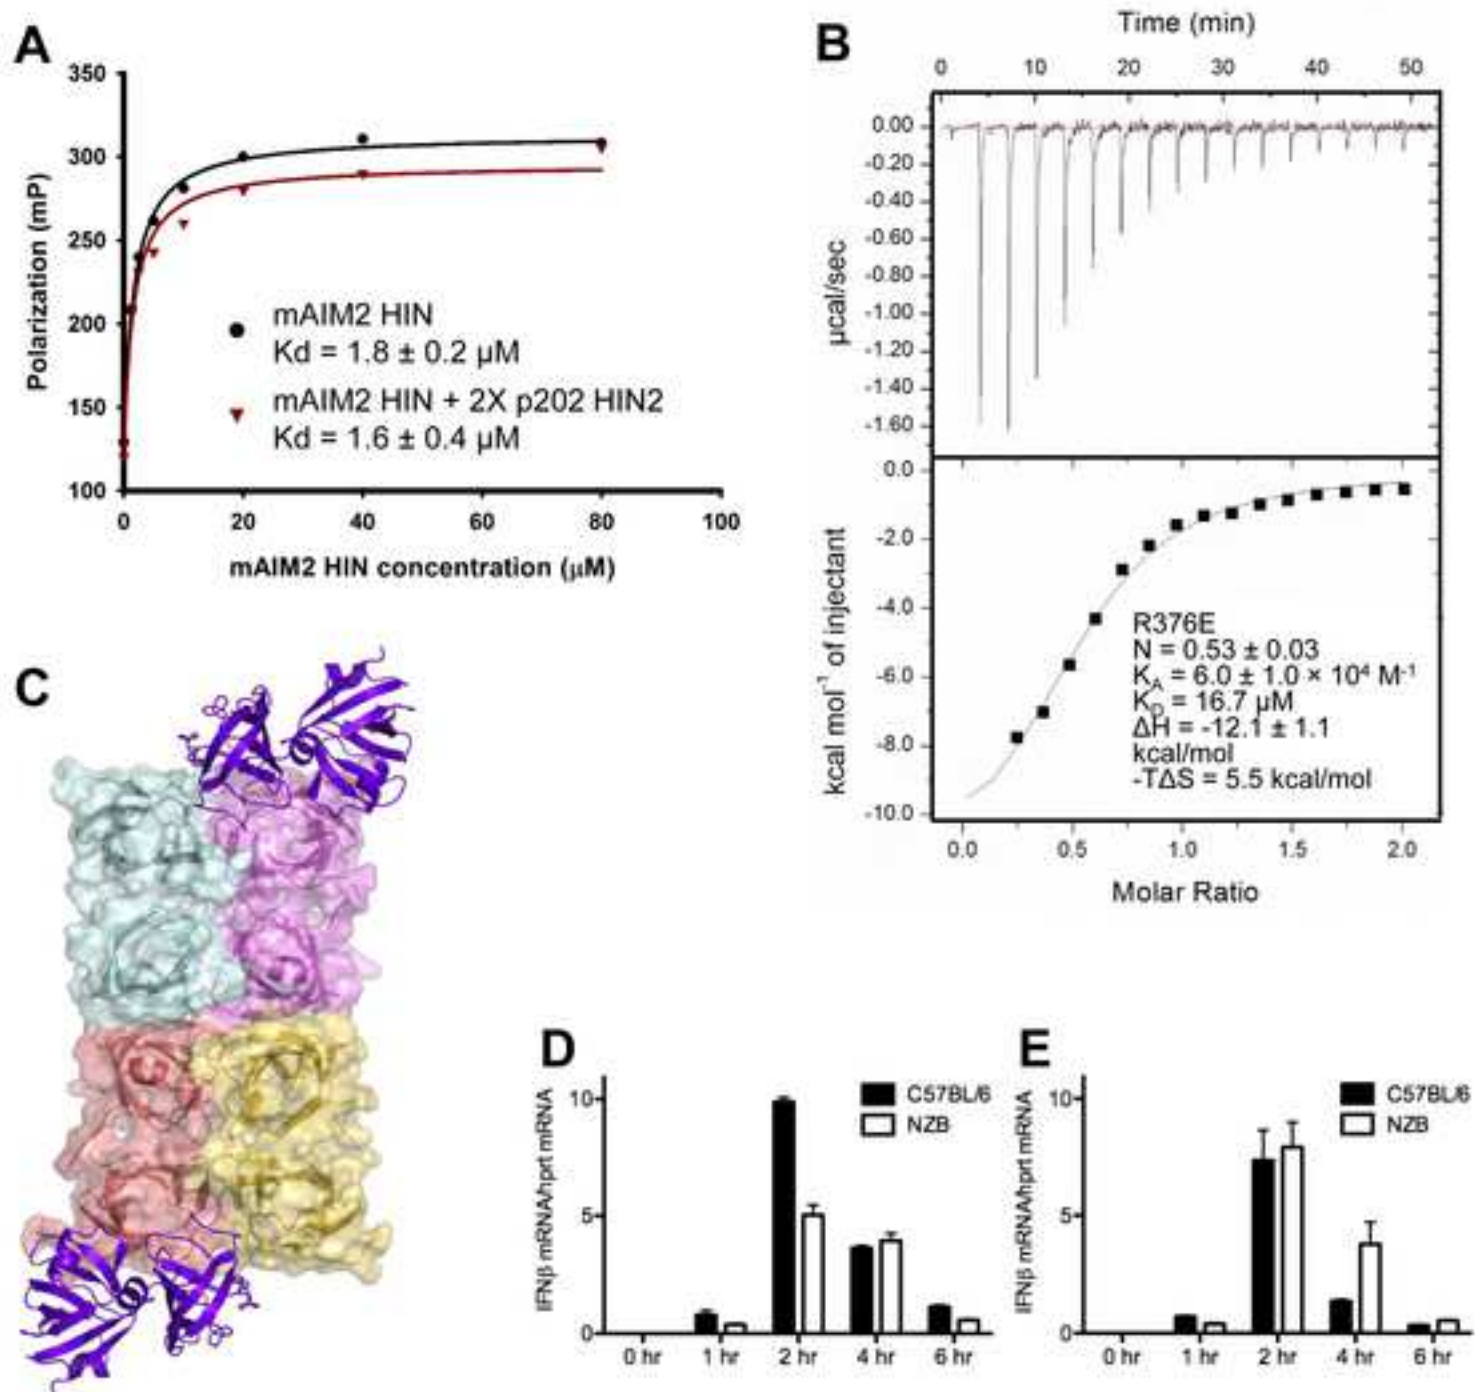

Supplement: NIHMS500485-supplement-02.pdf [file NIHMS500485-supplement-02.pdf]
